# Supplementary material for: Carbon-supported nickel/nickel oxide nanohybrid composite as a high-performance sensor for electrochemical non-enzymatic glucose detection
Source: Royal Society of Chemistry journal article supplement (doi:10.1039/d4nj01840k), 2024-01-01
Supplement: d4nj01840k1.pdf [file d4nj01840k1.pdf]

# **Carbon-supported Nickel/Nickel Oxide Nanohybrid Composite as a High-Performance Sensor for Electrochemical Non-Enzymatic Glucose Detection**

**Jagadish Ramu<sup>a, ‡</sup>, Subramaniyan Ramasundaram<sup>b, ‡</sup>, Shivaraj Yellappa<sup>c</sup>,  
Lavanya Gunamalai<sup>d</sup>, Tapas Kamilya<sup>e</sup>, Mohd Afzal<sup>f</sup>, A. Anto Jeffery<sup>g</sup>, Tae Hwan  
Oh<sup>b, \*</sup>, Mallappa Mahanthappa<sup>h, \*</sup>, Vishwanath R S<sup>i, \*</sup>**

<sup>a</sup>Department of Chemistry, Maharani's Science College for Women, Mysore 570005, India

<sup>b</sup>School of Chemical Engineering, Yeungnam University, Gyeongsan 38436, Republic of Korea.

<sup>c</sup>Department of Chemistry, Bangalore University, Jnana Bharathi Campus, Bengaluru-560056, India.

<sup>d</sup>Institute of Molecular Medicine, University of Texas Health Science Centre, Houston, Texas-77030, USA

<sup>e</sup>School of Applied & Interdisciplinary Sciences, Indian Association for the Cultivation of Science, Jadavpur, Kolkata 700032, India.

<sup>f</sup>Department of Chemistry, College of Science, King Saud University, Riyadh 11451, Saudi Arabia.

<sup>g</sup>Department of Bioengineering, Saveetha School of Engineering, Saveetha Institute of Medical and Technical Sciences (SIMATS), Chennai 602105, Tamil Nadu, India

<sup>h</sup>Department of Chemistry, School of Applied Sciences, REVA University, Bengaluru-560064, India.

<sup>i</sup>Centre for Research in Functional Materials (CRFM), JAIN (Deemed-to-be University), Jain Global Campus, Bengaluru 562112, Karnataka, India.

‡ These authors contributed equally to this work.

**\*Corresponding authors:**

Dr. Mallappa Mahanthappa, E-mail: [muttu.may1@gmail.com](mailto:muttu.may1@gmail.com)

Dr. Vishwanath R S, E-mail: [rs.vishwanath234@gmail.com](mailto:rs.vishwanath234@gmail.com)

Dr. Tae Hwan Oh, E-mail: [taehwanoh@ynu.ac.kr](mailto:taehwanoh@ynu.ac.kr)

### Synthesis of graphitic carbon nitride (g-C<sub>3</sub>N<sub>4</sub>)

Bulk G-C<sub>3</sub>N<sub>4</sub> was prepared according to a previously reported approach<sup>1</sup>. In this process, 3 g of melamine was grinded for 10 minutes. Then, the resulting compound was transferred to a silica crucible for calcination at 550 °C (heating rate of 5 °C/min), and holding the sample at the same temperature for 3 h until a yellow powder of bulk g-C<sub>3</sub>N<sub>4</sub>.

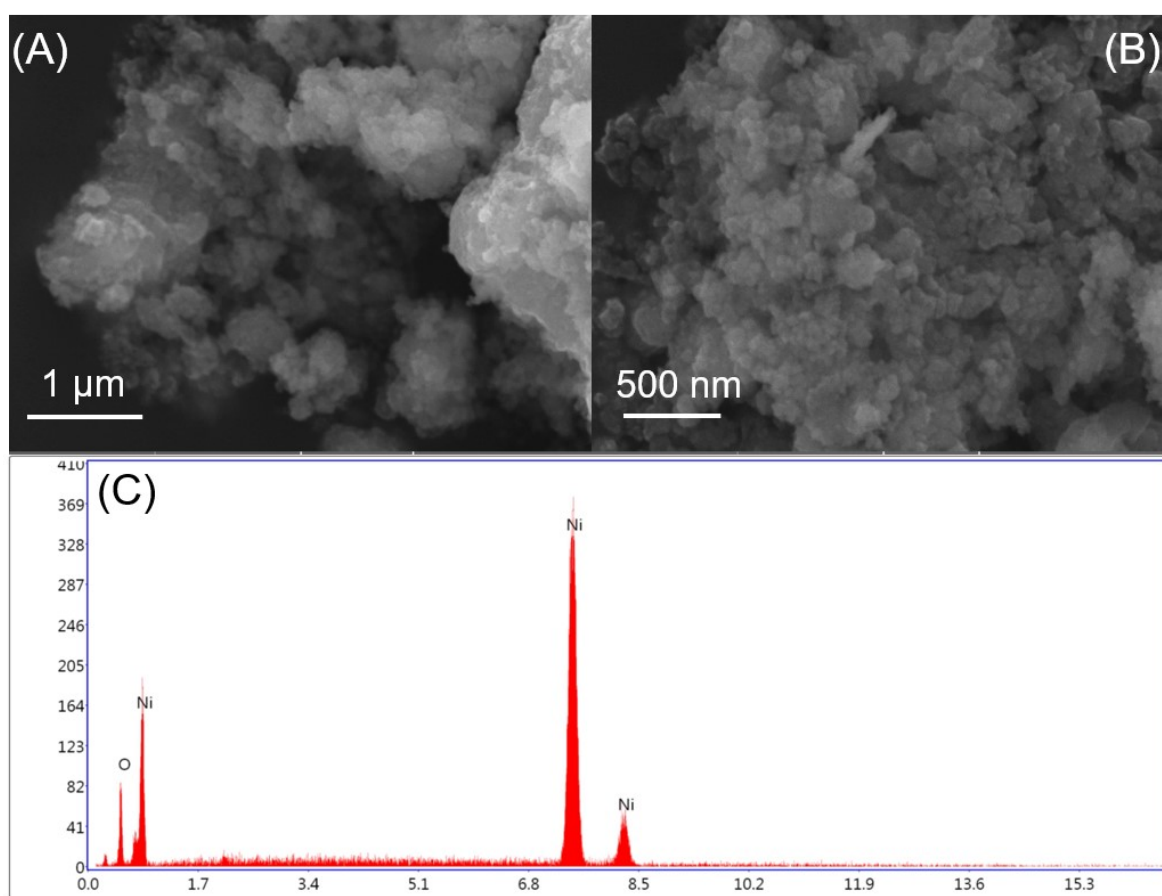

**Figure S1 (A)-(B)** SEM micrographs and **(C)** Energy dispersive spectrum of Ni/NiO sample.

**Table S1.** The weight percentage of each element in Ni/NiO and Ni/NiO@C samples

| Compound | Element | Weight (%) | Atomic (%) | Intensity | Error (%) | K ratio |
|----------|---------|------------|------------|-----------|-----------|---------|
| Ni/NiO   | Ni      | 89.86      | 70.72      | 393.30    | 2.43      | 0.9065  |
|          | O       | 10.14      | 29.28      | 29.35     | 11.62     | 0.0418  |
| Ni/NiO@C | Ni      | 50.48      | 19.30      | 321.48    | 10.93     | 0.4642  |
|          | O       | 25.48      | 35.75      | 73.39     | 2.91      | 0.4642  |
|          | C       | 24.04      | 44.94      | 27.25     | 12.59     | 0.0668  |

was obtained from EDS.

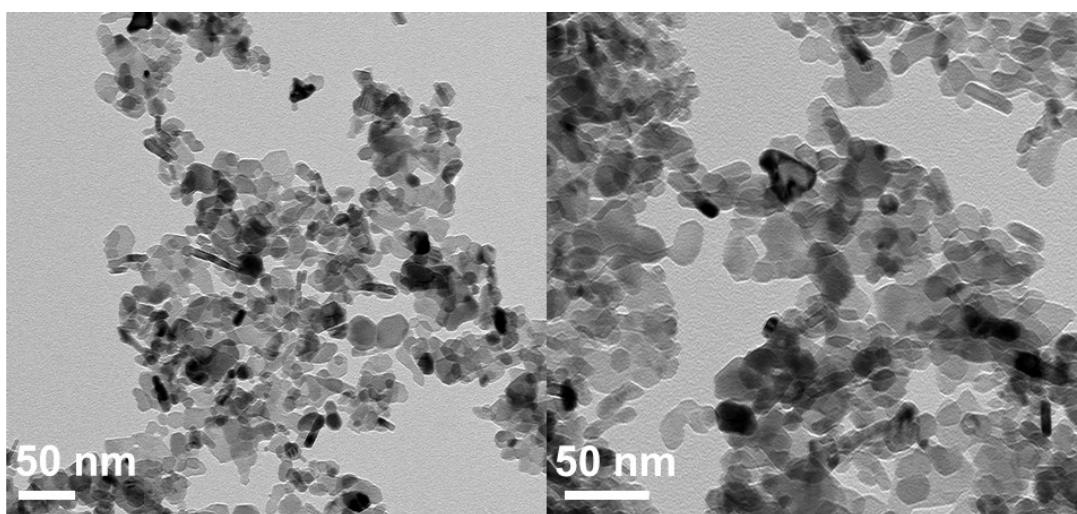

**Figure S2.** TEM images of Ni/NiO sample.

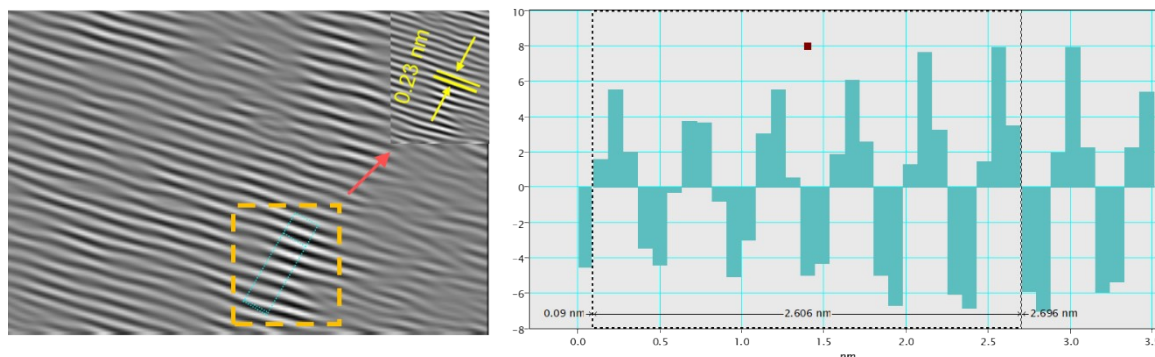

**Figure S3.** The determination of d-spacing from HR-TEM images

### Electrochemical Characterization of Ni/NiO and Ni/NiO@C material

Before the electrochemical measurements, the electrode surface properties of Ni/NiO and Ni/NiO@C modified GCE were examined by using electrochemical impedance on benchmark ferricyanide  $[\text{Fe}(\text{CN})_6]^{3-/4-}$  redox system. In the Nyquist diagram, the semicircle signifies the charge transfer resistance ( $R_{ct}$ ), which is related to the kinetics of electron transfer at the electrode surface, while the linear portion denotes diffusion<sup>2, 3</sup>. **Figure S4** represents the Nyquist plots of 0.1 M KCl containing 5 mM  $[\text{Fe}(\text{CN})_6]^{3-/4-}$  at GCE [**Curve (iii)**], Ni/NiO/GCE [**Curve (ii)**] and Ni/NiO@C/GCE [**Curve (i)**]. From **Figure S4**, a semicircle with a larger diameter is attained for bare GCE while a smaller semicircle was observed in Ni/NiO/GCE and Ni/NiO@C/GCE in the frequency range of 0.01 Hz to 100 kHz. For bare GCE, Ni/NiO/GCE, and Ni/NiO@C/GCE, the  $R_{ct}$  values of 26.3, 6.1, and 2.3 k $\Omega$ , respectively. Compared with bare GCE and Ni/NiO/GCE, Ni/NiO@C/GCE showed a very smaller semicircle with lower  $R_{ct}$  which indicates the higher electrocatalytic activity. The higher electrocatalytic activity of Ni/NiO@C is observed due to the presence of conductive carbon, oxygen vacancies and surface defects on the crystal lattice system which accelerate the charge transfer

process on the electrode-electrolyte interface. This could be the reason for the improved electrochemical response at the electrode-electrolyte interface.

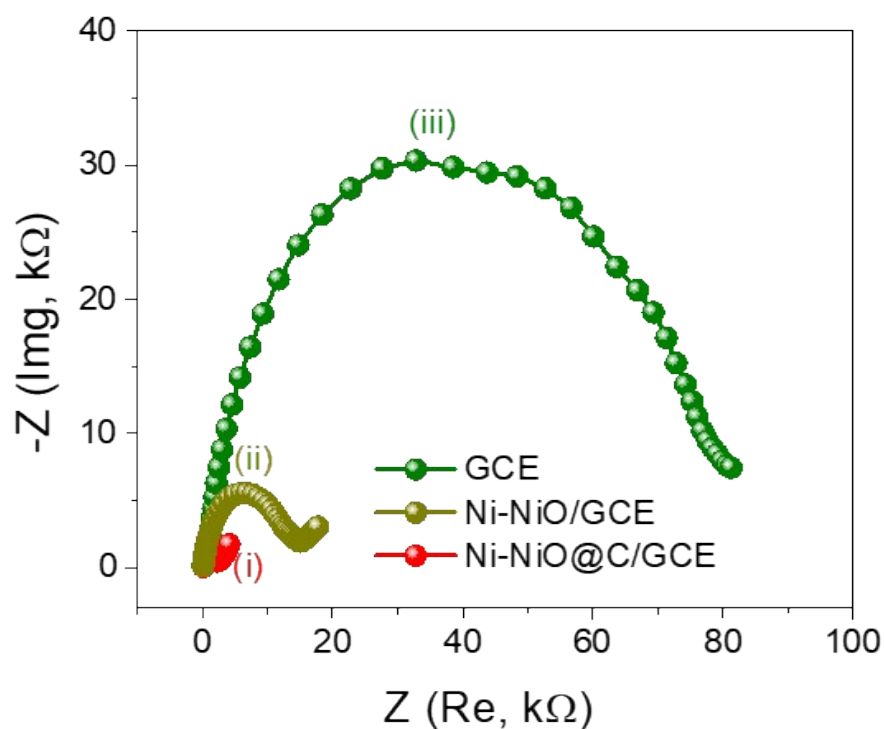

**Figure S4.** Electrochemical impedance performance of unmodified GCE [Curve (iii)], Ni/NiO/GCE [Curve (ii)], and Ni/NiO@C/GCE [Curve (i)] in 0.1M KCl containing 5 mM  $[\text{Fe}(\text{CN})_6]^{3-/4-}$ .

## References

1. H. Ghafuri, Z. Tajik, N. Ghanbari and P. Hanifehnejad, *Scientific Reports*, 2021, **11**, 19792.
2. K. K. Tadi and R. V. Motghare, *Journal of The Electrochemical Society*, 2016, **163**, B286.
3. M. Mahanthappa, N. Kottam and S. Yellappa, *Analytical Methods*, 2018, **10**, 1362-1371.
